# Supplementary material for: Resveratrol inhibits the malignant progression of hepatocellular carcinoma via MARCH1-induced regulation of PTEN/AKT signaling
Source: Aging (Albany NY). 2020 Jun 12;12(12):11717–31. doi: 10.18632/aging.103338 (PMC7343503; doi:10.18632/aging.103338)
Supplement: Supplementary Figure 1 [file aging-12-103338-s001..pdf]

## SUPPLEMENTARY FIGURE

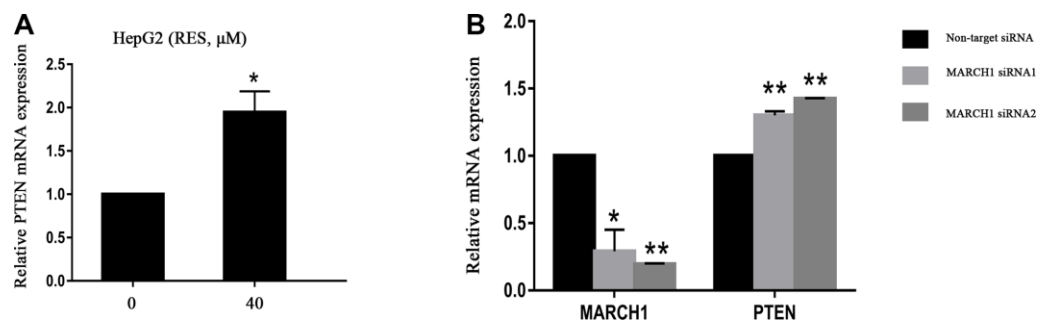

**Supplementary Figure 1. The expression of PTEN mRNA were demonstrated.** (A) HepG2 cells were treated with the indicated dose of resveratrol for 24h and then analysed the transcription level of PTEN. (B) HepG2 cells were infected with indicated concentrations of siRNA for 48 h. Then the mRNA MARCH1 expression significantly decreased, while mRNA PTEN expression increased.
